# Collective Intelligent Strategy for Improved Segmentation of COVID-19 from CT

Surochita Pal Das\*, Sushmita Mitra, and B. Uma Shankar

Machine Intelligence Unit, Indian Statistical Institute, 203, B.T. Road,  
Kolkata, 700108, West Bengal, India.

December 21, 2022

## Abstract

The devastation caused by the coronavirus pandemic makes it imperative to design automated techniques for a fast and accurate detection. We propose a novel non-invasive tool, using deep learning and imaging, for delineating COVID-19 infection in lungs. The Ensembling Attention-based Multi-scaled Convolution network (EAMC), employing Leave-One-Patient-Out (LOPO) training, exhibits high sensitivity and precision in outlining infected regions along with assessment of severity. The Attention module combines contextual with local information, at multiple scales, for accurate segmentation. Ensemble learning integrates heterogeneity of decision through different base classifiers. The superiority of EAMC, even with severe class imbalance, is established through comparison with existing state-of-the-art learning models over four publicly-available COVID-19 datasets. The results are suggestive of the relevance of deep learning in providing assistive intelligence to medical practitioners, when they are overburdened with patients as in pandemics. Its clinical significance lies in its unprecedented scope in providing low-cost decision-making for patients lacking specialized healthcare at remote locations.

**Keywords**— Ensembling, Deep learning, COVID-19 segmentation, Class imbalance, Multi-scaling

## 1 Introduction

The recent pandemic, called the novel coronavirus-disease-2019 (COVID-19), has been a major threat to world-health [29]; with medical systems collapsing around the globe. It resulted in an increasing demand for health services, encompassing finite components like beds, critical medical equipment, and healthcare workers (who also get regularly infected). Even the year 2022 has seen proliferation of newer strains of the virus affecting humankind. Some of the major COVID-19 complications, in case of serious level of infection, include acute respiratory distress syndrome (ARDS), pneumonia, multi-organ failure, septic-shock, and even death. Serious illness is more likely to

---

\*corresponding Author.

email(s): pal.surochita@gmail.com; sushmita@isical.ac.in; uma@isical.ac.in

All the authors contributed equally to this research.

**NOTE:** This preprint reports new research that has not been certified by peer review and should not be used to guide clinical practice.  
This work was supported by the J. C. Bose National Fellowship, sanction no. JCB/2020/000033 of S. Mitra

34 result in people with existing co-morbidities. Often there exist long term side-effects  
35 in post-COVID patients.

36 An early detection, diagnosis, isolation and prognosis, play a major role in con-  
37 trolling the spread of the disease. Computed tomography (CT) and X-rays are the  
38 commonly used imaging techniques for the lung. The CT scan uses X-rays to produce  
39 a 3D view comprising cross-sectional slices, for detecting existing anomalies. Occur-  
40 rence of false negatives in the “gold standard” RT-PCR test results often lead to the  
41 chest CT scans being an useful supplement in projecting typical infection characteris-  
42 tics – like Ground-Glass Opacity (GGO) and/or mixed consolidations. It was reported  
43 [12] that Lung CT images are more sensitive (98%), as compared to RT-PCR (71%),  
44 in correctly predicting COVID-19.

45 Doctors reported difference in CT abnormalities related to COVID-19 patients in  
46 multiple studies [10, 17]. It was observed, even at early stages, that viral infections were  
47 indicated by clear patterns [5, 10]. In Ref. [17] the researchers assessed the effectiveness  
48 of chest CT in the diagnosis and treatment of COVID-19. The CT characteristics of  
49 COVID-19 were presented and compared with the manifestations of other viruses.

50 Abnormalities in CT may occur [10] before the appearance of clinical symptoms.  
51 Multifocal, unilateral, and peripherally based GGO are examples of classic patterns,  
52 which are also observed in symptomatic cases. Abnormalities like inter-lobular septal  
53 thickening, thickening of the surrounding pleura, round cystic alterations, nodules,  
54 pleural effusion, bronchiectasis, and lymphadenopathy were infrequently detected in  
55 the asymptomatic group.

56 Manually detecting COVID-affected regions from lung CT scans is time consuming  
57 and prone to inherent human bias. Thus automated or semi-automated Computer-  
58 Aided-Diagnosis (CAD) becomes necessary [4, 24]. An accurate, automated detection  
59 and delineation of the COVID-19 infection is of great importance since this results in  
60 an effective monitoring of its spread within the lungs. This helps in predicting the  
61 severity of the infection, as well as its prognosis.

62 Smart machines can imitate the human brain to some extent. Everything that  
63 makes a machine smarter falls under the umbrella called Artificial Intelligence (AI).  
64 Machine Learning (ML), which is a subset of AI, consists of a collection of algorithms  
65 and tools which enable a machine to understand patterns within the data without being  
66 explicitly programmed. ML uses this underlying structure to perform logical reasoning  
67 for a task. Deep Learning (DL), again, is a sub-domain of ML [14]. It aids a machine  
68 in learning hidden patterns within the data without any expert intervention, to make  
69 predictions – given high computational power and a massive volume of annotated data.  
70 A convolution neural network (CNN), which is a DL model, has been shown to perform  
71 effectively in analyzing visual images. A CNN model, which was designed to recognize  
72 objects in natural-images from the ImageNet Large-Scale Visual Recognition Challenge  
73 (ILSVRC), was found to be comparable in efficiency to humans [16].

74 The *U*-Net [27] is an encoder-decoder type of CNN architecture, designed for the  
75 segmentation of biomedical images in a fast and precise manner. The encoder arm  
76 causes the spatial dimension to be decreased, while increasing the number of channels.  
77 In contrast, the decoder arm decreases the channels while raising the spatial dimen-  
78 sions. Introduction of attention gates (AGs) [23] in the *U*-Net framework, help reduce  
79 the feature responses in irrelevant background regions, while providing more weight to  
80 region of interest (ROI). The network is guided towards learning only the relevant infor-  
81 mation in terms of the weighted local features. Incorporating dilated convolutions [13]  
82 allows feature extraction at multiple scales.

83 Multi-scalar approaches, which observe and evaluate a dataset at several scales,  
84 are popular in the machine learning domain. They capture the local geometry of  
85 neighbourhoods, which are characterised by a collection of distances between points or  
86 groups of closest neighbours. This is analogous to looking at a portion of a slide at

87 various microscopic resolutions; whereby, very small features can be detected at high  
88 resolution from a restricted region of the sample. As the majority portion of the slide  
89 is examined at a lower resolution, it allows one to examine the larger (global) features  
90 as well. Multi-scalar methods have been found to perform better than state-of-the-art  
91 techniques, with reduced sample sizes, in the medical domain [32].

92 An ensemble-based classifier system is designed by merging multiple diverse classi-  
93 fier models. Ensembling makes statistical sense in a number of situations. We regularly  
94 employ such an approach in our daily lives while seeking the advice of various experts  
95 prior to taking a major decision. For instance, we frequently seek the advice of numer-  
96 ous doctors before consenting to a medical procedure. The main objective is to reduce  
97 the regrettable choice of a needless medical procedure. The experts must differ from  
98 one another in some way for this mechanism to be successful. Individual classifiers, due  
99 to their inherent diversity, can produce various decision limits within the context of  
100 classification. This is commonly achieved by employing distinct training setup for each  
101 classifier. If adequate diversity is established, each classifier will commit a separate  
102 error, which may then be strategically combined to lower the overall error [25].

103 Advantage of ensemble learning lies in its inherent diversity. This can be introduced  
104 by embedding different training datasets, or features, or classifiers; or even differing ini-  
105 tialization and/or parameters of the classifier(s) involved. According to Dietterich [9]  
106 there are three main justifications for employing an ensemble-based system, *viz.* sta-  
107 tistical, computational, and representational. The computational criterion refers to  
108 the model selection problem. The statistical cause is connected to the insufficiency  
109 of available data to accurately represent a distribution. The representational cause  
110 addresses situations where the selected model is unable to accurately represent the  
111 desired decision boundary.

112 Numerous studies have been reported in recent times in the domain of COVID-19,  
113 using neural networks and data-driven algorithms. These include machine learning ap-  
114 proaches for diagnosis of COVID-19 from X-Ray/ CT images [22, 26, 35]. A pre-trained  
115 deep-learning model, called DenseNet, was developed [35] for classifying 121 CT-images  
116 into COVID-19 positive and negative categories. Application of the ResNet-18 was  
117 made [37] to segment and classify lung-lesions of COVID-19, pneumonia infection, and  
118 normal ones.

119 A deep learning based AI system was designed [41] to detect and quantify lesions  
120 from chest CT. It can remove scan-level bias to extract precise radiomic features. The  
121 Unified CT-COVID AI Diagnostic Initiative (UCADI) [3] enables independent training  
122 at each host institution, under a combined learning framework, without data sharing.  
123 This was shown to outperform the local models, thereby advancing the prospects of  
124 utilizing combined learning for privacy-preserving AI in digital health.

125 Deep learning has been employed for evaluating the severity of COVID-19 infec-  
126 tion [36]. Well-known deep models, like *U-Net* [27], Residual *U-Net* [39], Attention  
127 *U-Net* [23], have been used for screening COVID-19. There exist ensemble methods  
128 for segmentation of CT images [7, 11]. The Inception-V3, Xception, InceptionResNet-  
129 V2 and DenseNet-121 were ensembled [11] for a multiclass segmentation of GGO and  
130 Consolidation in COVID-19 CT data over the data CT-Seg (Table 1). Each of these  
131 models used the CNN as backbone, with pre-trained weights from ImageNet being  
132 further trained over the CT-Seg data. The split into training, validation and testing  
133 sets were 40, 10, 50 images, respectively, with pixel-level soft majority voting being  
134 employed for their aggregation.

135 A cascade of two *U-Nets*, with VGG backbone, was ensembled [7] to extract the lung  
136 region, followed by the delineation of the GGO and consolidation regions. Multiclass  
137 segmentation of GGO and Consolidation was performed over CT-Seg, Seg-nr.2 and  
138 Kaggle-COVID-19 datasets (Table 1) along with some private dataset; while the train-  
139 ing data contained parts of CT-Seg and Seg-nr.2, the remaining parts of the datasets

140 were used for testing the model. The training process of each network in the ensemble  
 141 differed due to random weight initialization, and data augmentation with shuffling.

142 Domain Extension Transfer Learning (DETL) was employed [6] for the screening of  
 143 COVID-19, with characteristic features being determined from chest X-Ray images. In  
 144 order to get an idea about the COVID-19 detection transparency, the authors employed  
 145 the concept of Gradient Class Activation Map (Grad-CAM) for detecting the regions  
 146 where the model paid more attention during the classification. The results are claimed  
 147 to be strongly correlated with clinical findings.

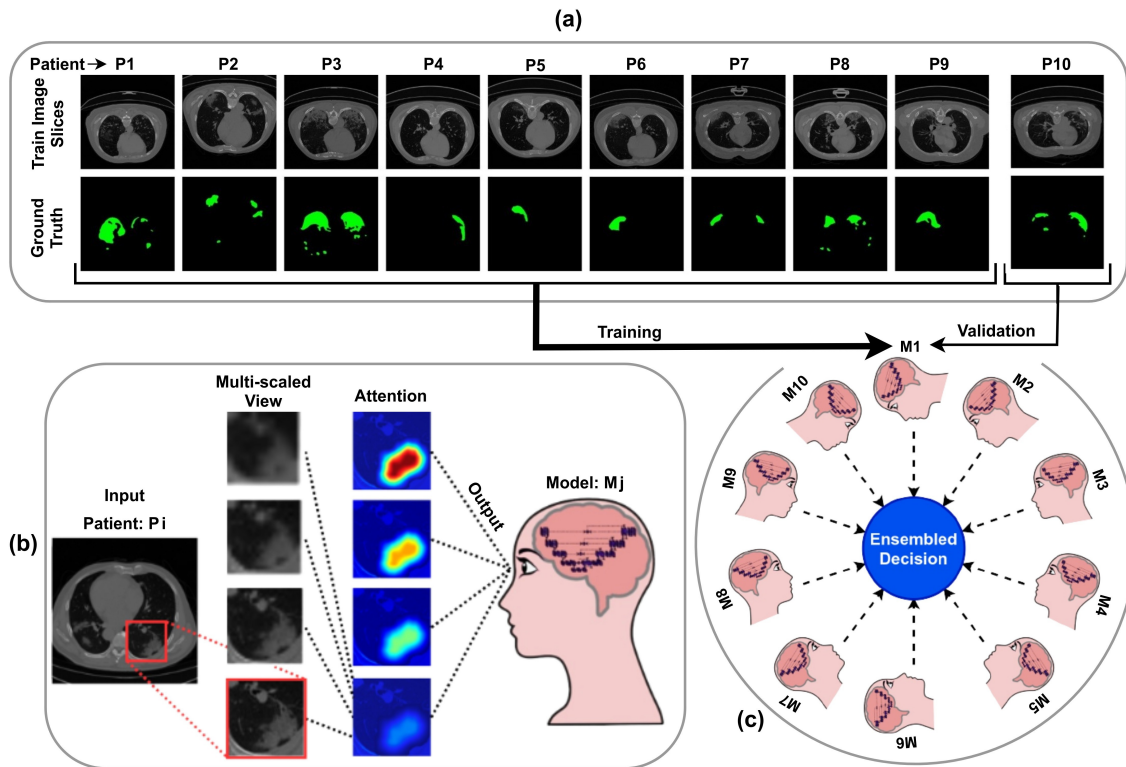

Figure 1: Schematic representation of Ensembling with LOPO the Attention-based Multi-scaled CNNs. (a) Leave-One-Patient-Out scheme *LOPO*. (b) Attention-based Multiscaled view in *AMC*. (c) Ensembling of the *AMC* Models

## 148 2 Results

149 We propose a novel Ensembled Attention-based Multi-scaled Convolution networks  
 150 (*EAMC*), using *LOPO* learning, based on CT images of TEN patients and trained  
 151 using TEN base-classifiers. As each classifier takes only nine samples (patients) for  
 152 training, and starts from scratch, it does result in a completely new classifier with  
 153 different set of parameters. The remaining ONE sample is left for validation in each  
 154 case (as elaborated in Section 2.2). These TEN trained classifiers are ensembled to  
 155 segment the COVID-infection region (ROI) through majority voting, over four different  
 156 test datasets collected from various publicly available sources (Table 1). The workflow  
 157 of the *EAMC* is visualized in Fig. 1.

158 The objective of the model is to segment a COVID-19 infected CT lung image into  
 159 its Regions of Interest (ROI) [*i.e.*, GGO and Consolidation], and background (contain-  
 160 ing all other regions in the image). This is not an easy task for a vanilla *U-Net*. There-  
 161 fore, an *AG* is carefully incorporated to focus on the ROI, whereas the multi-scalar  
 162 dilation provides the necessary local and neighbourhood information representation for



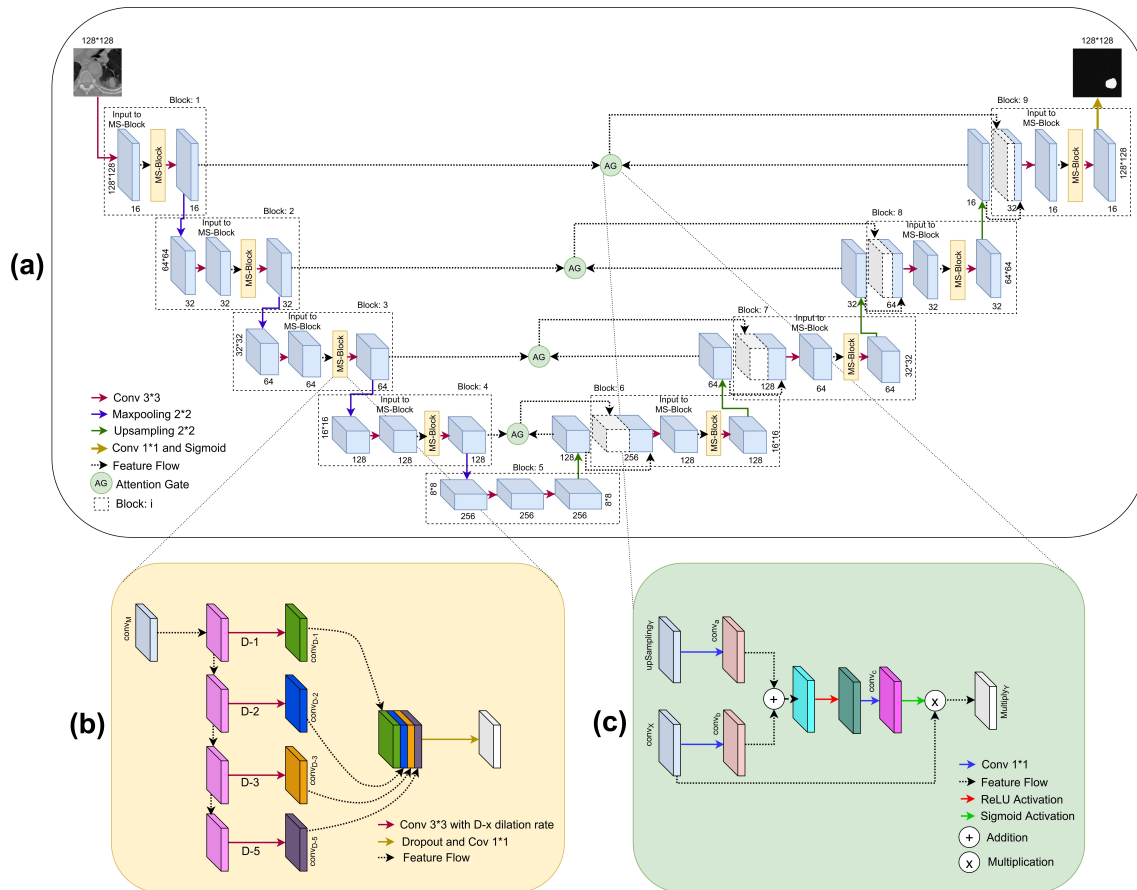

Figure 2: (a) The *AMC-Net* framework, with detailed representation of (b) of *MS*-block, and (c) Attention Gate (*AG*)

163 delineating the ROI. Focal Loss (*FL*) [eqn. (3)] is used as the loss function to compen-  
 164 sate for class imbalance. Finally we implement ensembling by *LOPO* for training with  
 165 limited annotated data. The details about the training dataset are provided in Section  
 166 5. Validation is successfully performed on unseen, independently-compiled data from  
 167 multiple publicly-available data sources. The proposed *EAMC* of Fig. 1, using *LOPO*  
 168 ensemble learning on *AMC-Net* of Fig. 2, demonstrates good generalization capability.  
 169 It is efficient, accurate, consistent and robust on the unseen data. The architecture of  
 170 *AMC-Net* is summarized in Tables 7-9.

## 171 2.1 Data used

172 Four datasets, with details as provided in Table 1, were used in this study. The Kaggle-  
 173 COVID-19 data comprises 20 patient samples, of which ten (having at least 200 but  
 174 not more than 301 slices) were kept for training. This was named as Kaggle-COVID-  
 175 19:Part-1 dataset. The remaining ten samples, each containing < 200 or > 301 slices,  
 176 were retained for testing. This was termed the Kaggle-COVID-19:Part-2 dataset. The  
 177 data is available on the Kaggle platform<sup>1</sup> in annotated form [19]. The other three  
 178 datasets, of Table 1, were also clubbed together for testing. The unseen test datasets  
 179 were thus used only for evaluating the generalization performance of *EAMC*.

Table 1: Breakup of Infected & Non-Infected samples and slices, in the training and test datasets

| Sr. | Dataset                               | Total patients  | Infected slices | Non-Infected slices | Comment  |
|-----|---------------------------------------|-----------------|-----------------|---------------------|----------|
| 1   | Kaggle-COVID-19 <sup>a</sup> : Part-1 | 10              | 1351            | 1230                | Training |
|     | Kaggle-COVID-19 <sup>a</sup> : Part-2 | 10              | 493             | 446                 | Testing  |
| 2   | CT-Seg <sup>b</sup>                   | >40             | 100             | 0                   | Testing  |
| 3   | Seg-nr.2 <sup>b</sup>                 | 9               | 372             | 457                 | Testing  |
| 4   | MosMed <sup>d</sup>                   | 47 <sup>§</sup> | 761             | 1166                | Testing  |

<sup>a</sup>Kaggle-COVID-19:

<https://www.kaggle.com/datasets/andrewmvd/covid19-ct-scans> [19]

<sup>b</sup>CT-Seg & Seg-nr.2 (Two Datasets): <http://medicalsegmentation.com/covid19/>

<sup>c</sup>MosMed: <https://mosmed.ai/en/> [21]

<sup>§</sup>Relevant 47 samples are used (actual available samples being 50).

Table 2: Description of Ensemble models, with *DSC* on corresponding validation sets

| Model No.                                                      | M1      | M2     | M3     | M4     | M5     | M6     | M7     | M8     | M9     | M10    |
|----------------------------------------------------------------|---------|--------|--------|--------|--------|--------|--------|--------|--------|--------|
| Training                                                       | P/{P10} | P/{P9} | P/{P8} | P/{P7} | P/{P6} | P/{P5} | P/{P4} | P/{P3} | P/{P2} | P/{P1} |
| Validation                                                     | P10     | P9     | P8     | P7     | P6     | P5     | P4     | P3     | P2     | P1     |
| DSC                                                            | 0.8882  | 0.8952 | 0.8617 | 0.8814 | 0.8432 | 0.8867 | 0.8944 | 0.8821 | 0.8787 | 0.8615 |
| where $P = \{ P_i: i \in \mathbb{N} \wedge i \in [1, 10] \}$   |         |        |        |        |        |        |        |        |        |        |
| Mean validation DSC = 0.8773, with Standard deviation = 0.0158 |         |        |        |        |        |        |        |        |        |        |

## 2.2 Implementational details

The ten classifier models considered are  $M1, M2, \dots, M10$ ; with the validation datasets defined as  $P10, P9, \dots, P1$ , and described in Table 2. In each case, the rest of the corresponding patient’s dataset is used for training by the *AMC-Net* model of Fig. 2. For example, in case-1,  $M1$  is trained with  $P1$  to  $P9$  patient datasets and validated on  $P10$  patient dataset. Similarly in case-2,  $M2$  is trained with  $P1$  to  $P8$  and  $P10$  patient datasets and validated on  $P9$  patient dataset, and so on for all the models  $M3$  to  $M10$ . Each model,  $M1$  to  $M10$ , is trained with different parameters, pertaining to initialization, learning rate, dropout probability, etc. The batch size was kept uniform at 16, using the Adam optimizer [15] over 70 epochs. Values of learning rate and dropout probability were set at 0.001 and 0.2, respectively, after several experiments. Run time augmentation (rotation  $\pm 10^\circ$ ; horizontal shift Range  $\pm 0.2$ ; vertical shift Range  $\pm 0.2$ ; zoom range  $\pm 0.2$ ) was employed during training.

The implementation was made in the Tensorflow framework, running behind wrapper library Keras using python version 3.6, Keras version 2.2.4, and Tensorflow-GPU version 1.13.1, with dedicated GPU (NVIDIA TESLA P6 having capacity of 16GB).

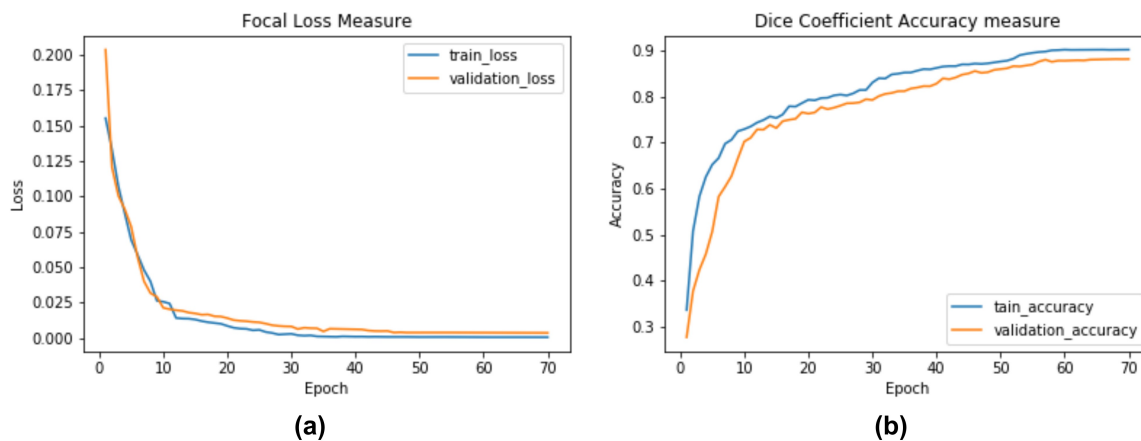

Figure 3: Sample learning curves, for Model M3, over training and validation sets; (a) loss:  $FL$ , and (b) accuracy:  $DSC$

## 2.3 Experimental outputs

Sample learning curves, depicting loss [*Focal Loss (FL)* of eqn. (3)] and accuracy [*Dice Score Coefficient (DSC)* of eqn. (9)], are illustrated in Fig. 3. The validation set corresponding to each model, with the resultant ( $DSC$ ), are presented in Table 2. The accuracy and robustness of output in each case is evident, showing an average  $DSC$  of 0.8773 with a standard deviation (SD) of 0.0158 on the validation datasets.

Next the explainability of the *AMC-Net* architecture was analysed. As evident from Fig. 4, each level of the encoder and decoder arms of the network architecture demonstrate extraction of meaningful features at different levels of abstraction. The abstraction level of the extracted features are dependent on the level of the Block. While some bright objects do get highlighted at the initial stages, as the Block depth increases the Attention and Multi-Scalar mechanisms of the *AMC-Net* assist in highlighting the ROIs (like, GGO and Consolidation) present in the CT patches and suppress the background.

For example, after Block 1 there are some features highlighting healthy lung tissue (yellow box) in the figure. There are also relevant edges corresponding to lung parenchyma (orange box). As the Block level increases, the attention over the lesion boundary (blue box) and lesion (green box) in Fig. 4 become more prominent. Eventually the final feature which prominently emerges is the lesion.

## 2.4 Comparative study

Using the *AMC-Net* as the base classifier, with ten classifiers  $M1$  to  $M10$  ensembled by *LOPO*, results were generated on the four test datasets, *viz.* Kaggle-COVID-19: Part2, CT-seg., Seg-nr.2, and MosMed (as described in Table 1 and Section 5) in terms of the performance metrics defined in eqns. (9)-(11).

The comparative analysis of output generated by the *EAMC*, on different test sets, is presented in Fig. 5. In all cases the test slices were divided into non-overlapping patches (as elaborated in Section 5.1). The segmentation output is aggregated using majority voting.

It is observed that all the metrics provided a consistently better performance over the MosMed data. This is perhaps because the average intensity of the CT scans in MosMed data is higher than that of the rest of the CT datasets used; thereby, providing

<sup>1</sup><https://www.kaggle.com/datasets/andrewmvd/covid19-ct-scans>

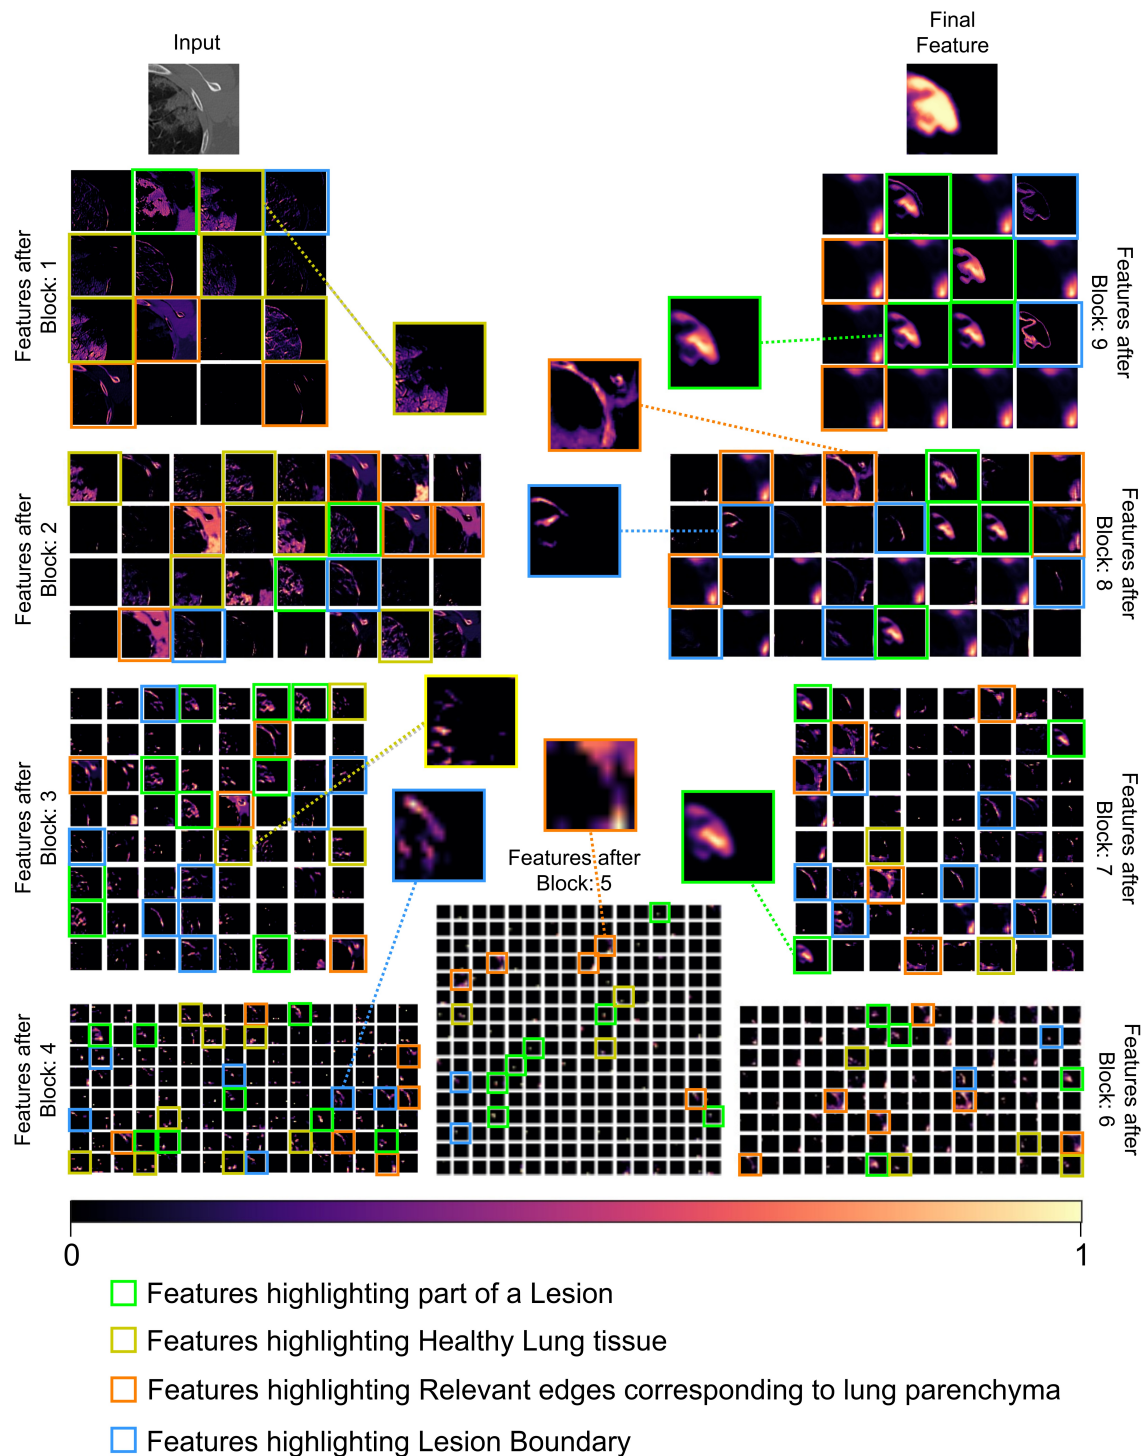

Figure 4: Visualization of features extracted after each Block of the *AMC-Net* from Fig 2

227 a better contrast between the ROI and background. Moreover the Hounsfield range is  
 228 not distorted here, such that there is less noise present.

229 In order to explore the effectiveness of *AMC-Net* as the base classifier in *EAMC*, we  
 230 also compared four state-of-the-art models like R2UNet [2], Inception Net [11], Xception  
 231 Net [11], and DenseNet [11] (which have been extensively employed in COVID-19  
 232 segmentation literature). Ensembling of classifiers, in each case, was by *LOPO* dur-  
 233 ing training (involving same hyper-parameters). Testing was performed on the four  
 234 datasets, as elaborated earlier. A comparative study of the evaluation metrics [eqns.  
 235 (9)-(11)] is provided in Fig. 5. It is found that all the metrics resulted in higher values

236  
237

for the ensembled *AMC-Net*, indicating a better generalization in segmentation over each test dataset.

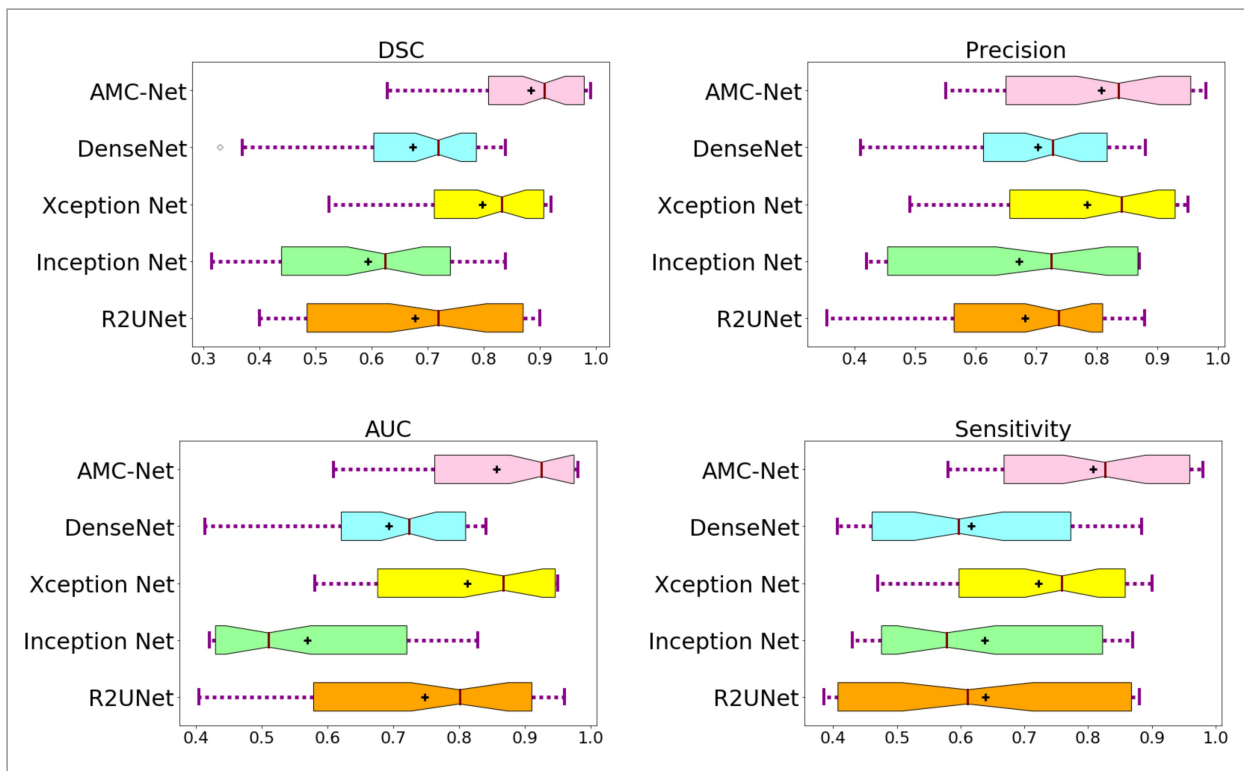

(a) Comparison over Kaggle Data

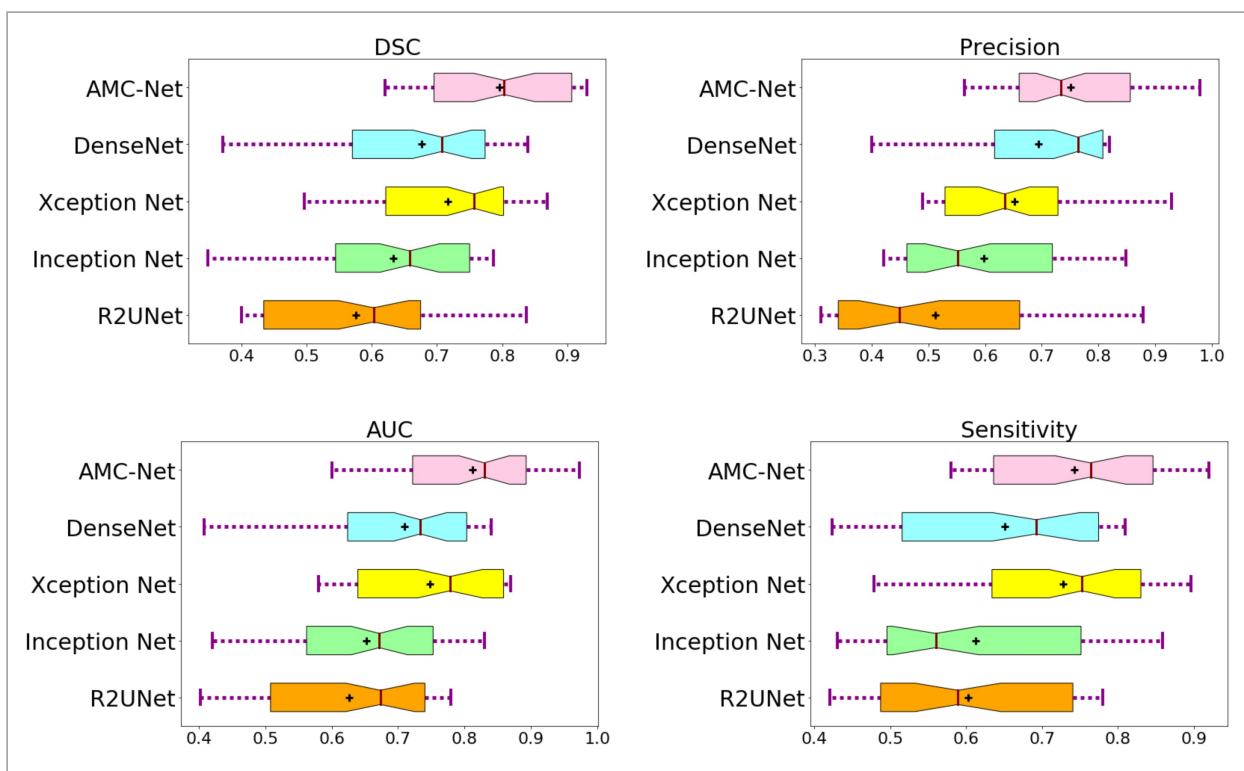

(b) Comparison over CT-Seg Data

Figure 5: Comparative performance evaluation of base classifiers, in the uniform framework of ensembling with *LOPO*, over the test datasets (continued)



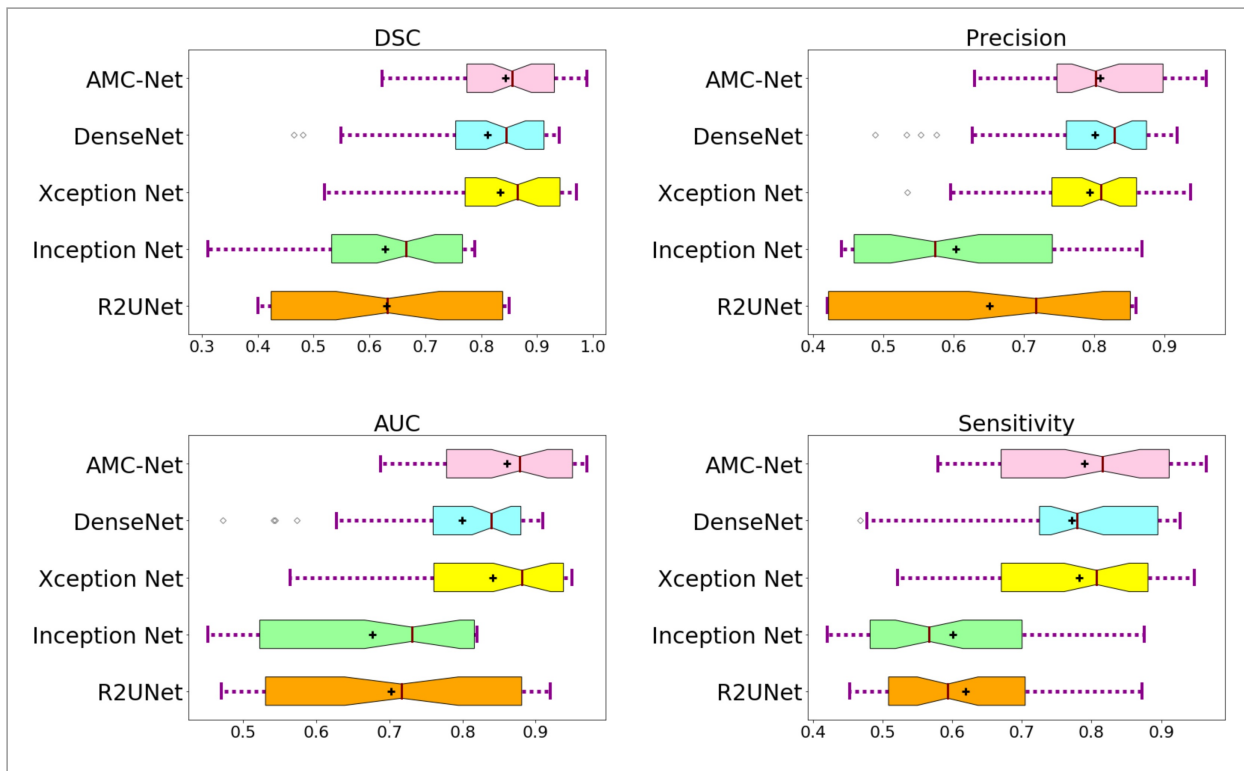

(c) Comparison over Seg-nr.2 Data

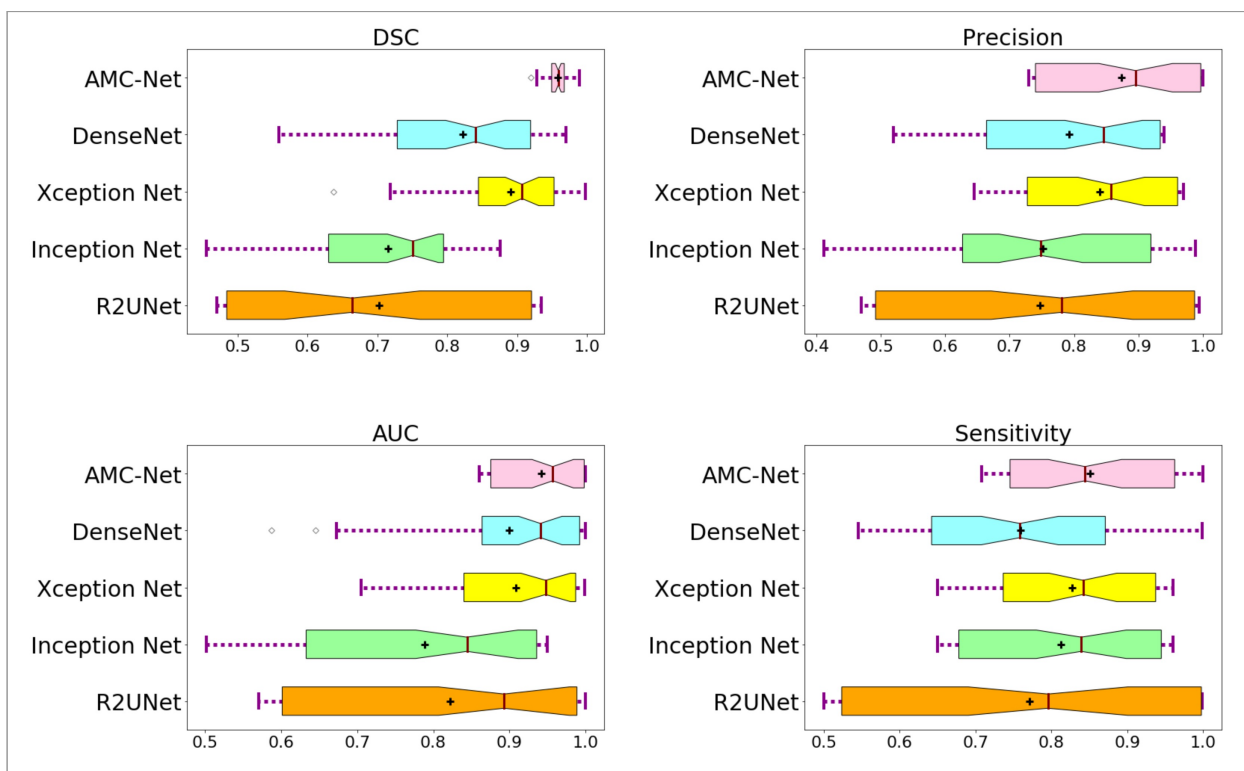

(d) Comparison over MosMed Data

Figure 5: Comparative performance evaluation of base classifiers, in the uniform framework of ensembling with *LOPO*, over the test datasets

238

Summarized below is the performance of our *EAMC* over the four test datasets under consideration.

239

- 240 • Kaggle-COVID-19:  $DSC\ 0.8840 \pm 0.103$ ,  $Precision\ 0.8072 \pm 0.148$ ,  $AUC\ 0.8562$   
241  $\pm 0.126$ ,  $Sensitivity\ 0.8082 \pm 0.145$ ;
- 242 • CT-Seg:  $DSC\ 0.7955 \pm 0.107$ ,  $Precision\ 0.7500 \pm 0.121$ ,  $AUC\ 0.8123 \pm 0.099$ ,  
243  $Sensitivity\ 0.7431 \pm 0.114$ ;
- 244 • Seg-nr.2:  $DSC\ 0.8431 \pm 0.101$ ,  $Precision\ 0.8089 \pm 0.096$ ,  $AUC\ 0.8613 \pm 0.091$ ,  
245  $Sensitivity\ 0.7905 \pm 0.125$ ;
- 246 • MosMed:  $DSC\ 0.9584 \pm 0.014$ ,  $Precision\ 0.8733 \pm 0.112$ ,  $AUC\ 0.9417 \pm 0.056$ ,  
247  $Sensitivity\ 0.8514 \pm 0.107$ .

248 An investigation into related results on COVID-19 segmentation with deep net-  
249 works, as reported in literature [7, 8, 19, 28, 31, 34] using some of the same test  
250 datasets, led to interesting conclusions with respect to our *EAMC*. The Seg-nr.2 test  
251 set yielded *DSC* of 0.673 [19], 0.620 [28]. The model [28] employed generative adver-  
252 sarial network (GAN) with *U-Net* as backbone, and reported a *Sensitivity* of 0.672.  
253 Their results on the MosMed test set show *DSC* 0.584, with *Sensitivity* 0.768 . Us-  
254 ing the Kaggle-COVID-19 dataset the authors reported [34] *DSC* 0.7103, *Sensitivity*  
255 0.6860. Combination of the test sets Kaggle-COVID-19 and Seg-nr.2 was also reported.  
256 The authors in Ref. [8], using the R2UNet as backbone, obtained a *DSC* of 0.851.  
257 On the other hand, using the basic *U-Net* as backbone [7] attained *DSC* 0.80. The  
258 Medseg (combination of CT-Seg and Seg-nr.2) dataset resulted in *DSC* 0.77 [31]. This  
259 establishes the effectiveness of our *EAMC*, the ensembled classifier using *AMC-Net*,  
260 in terms of these compared performance metrics over all test datasets.

## 261 2.5 Ablations

262 The first set of experiments were performed by evaluating the role of each of the com-  
263 ponents in *AMC-Net*, *viz.* *MS*-block and *AG*, when used in *EAMC*. The traditional  
264 *U-Net* is thus the baseline, with Attention *U-Net* incorporating only the *AG*. The  
265 *U-Net* with only the *MS*-block is termed the *MSU-Net*. The *AMC-Net* is the *U-Net*  
266 with both *AG* and *MS*-block. All four models were trained using the same ensembled  
267 *LOPO* framework. Comparative results on the four test datasets of Table 1, evalu-  
268 ated in terms of the performance metrics of eqns. (9)-(11), and Area Under the *ROC*  
269 Curve (*AUC*), are presented in Fig. 6. Here It is observed that the proposed *AMC*-  
270 Net performs the best, over all the metrics in all test datasets, as compared to the  
271 rest (lacking one or more of its modules). This helps justify the effectiveness of the  
272 proposed *EAMC*, which ensembles with *LOPO* a set of *AMC-Net* models.

273 The second task was to explore the effect of the different loss functions of eqns.  
274 (3)-(8) on the performance of the base model *AMC-Net*, without any ensembling.  
275 Results are provided in Table 3, over all the four test datasets. Here the ROI (*GGO*  
276 and consolidation) covers a minuscule portion of a CT slice. The Focal loss *FL* is  
277 found to be the best because of its capability in handling class imbalance; thereby,  
278 reducing misclassification error. As it predicts the outcome as probability, it can better  
279 distinguish between grades of severity in outcome. A mechanism of down-weighting  
280 the easier samples while emphasizing the more challenging ones, helps *FL* focus on the  
281 smaller ROIs while suppressing the background regions.

282 Note that ensembling in *EAMC* enhances the corresponding performance (as re-  
283 ported in Fig. 6) in terms of *DSC*.

284 Finally investigations were pursued with different Dilation rates in the convolution  
285 layers of the *MS*-block. It was observed that the combination  $D = 1, 2, 3$ , and 5,  
286 provides the best results over the test data, in terms of average *DSC*.

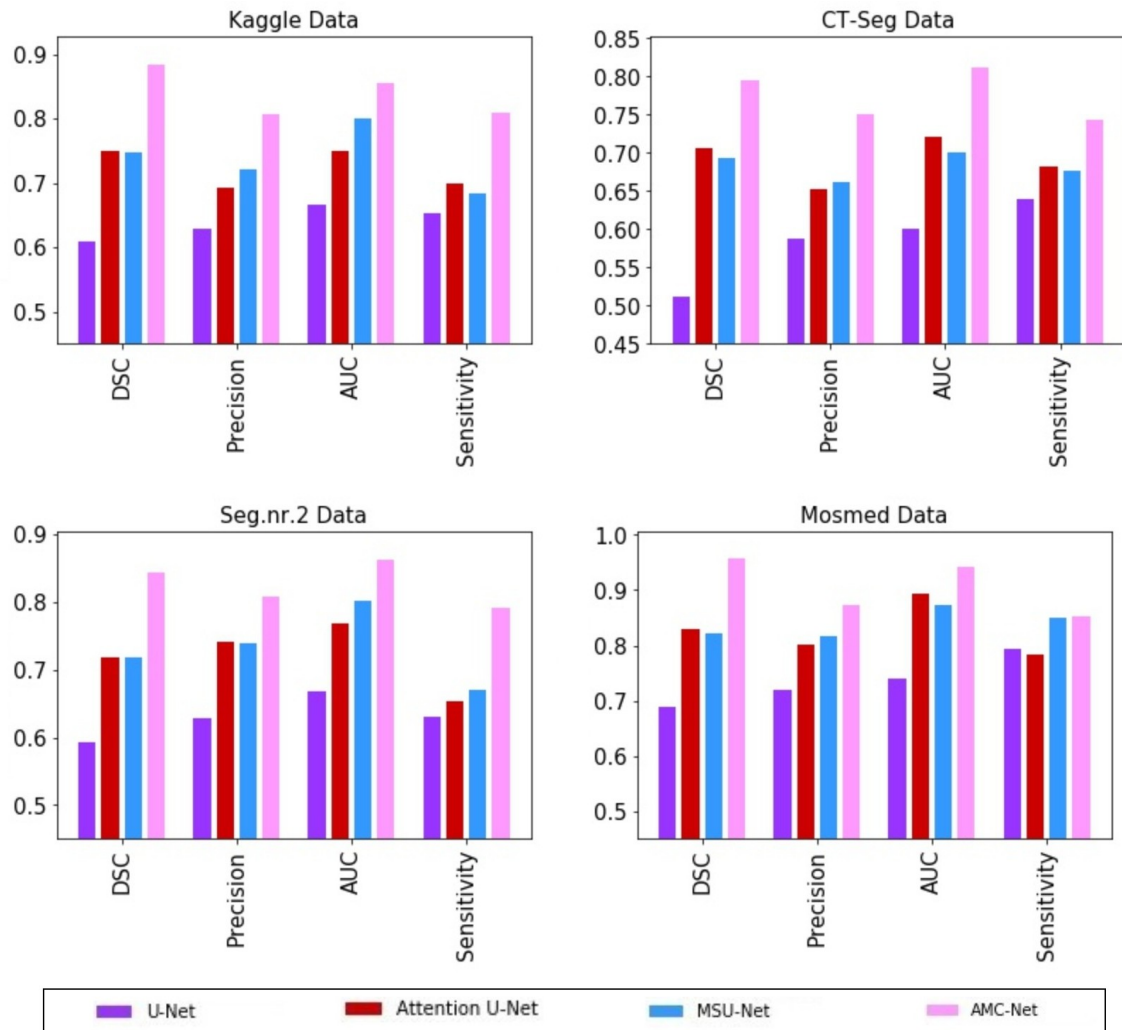

Figure 6: Role of different components of *AMC-Net*, as base classifier in *EAMC*, over the test datasets

## 2.6 Severity assessment

The methodology of grading the severity of COVID-19 infection, as developed by the Russian Federation [20], is based on individually computing the volume ratio of lesions in each lung and using the maximal value to assess the overall severity score. The range of the score is divided into five categories based on volume of damaged lung tissue.

- CT-0: not consistent with pneumonia (including COVID-19), *ie*, normal
- CT-1: infection involvement of  $\leq 25$  %
- CT-2: infection involvement of 25-50 %
- CT-3: infection involvement of 50-75 %
- CT-4: infection involvement of 75-100 %

Patients with CT-3 (severe pneumonia) or higher are typically hospitalized, with CT-4 (acute pneumonia) required to be admitted to an intensive care unit.

Table 5 quantifies the infected region in the sample test images, comprising the eight slices (two each from the four sets of test data) of Fig 8, along similar lines.

Fig. 7 depicts the qualitative assessment of the severity of infection, over the same eight sample slices, based on the color mask of the segmented output generated by JET Colormap [33]. The visualization uses the predicted probability values of the various

Table 3: Effect of various loss functions on *AMC-Net*, measured in terms of *DSC*, over the test datasets

| Loss function | Kaggle-COVID-19:<br>Part-2 | CT-Seg                | Seg-nr.2              | MosMed                |
|---------------|----------------------------|-----------------------|-----------------------|-----------------------|
| <i>DL</i>     | 0.7521 ± 0.174             | 0.7238 ± 0.201        | 0.7218 ± 0.136        | 0.8465 ± 0.251        |
| <i>CEDL</i>   | 0.7272 ± 0.142             | 0.7377 ± 0.193        | 0.7996 ± 0.147        | 0.8129 ± 0.180        |
| <i>IoU</i>    | 0.7937 ± 0.137             | 0.7190 ± 0.165        | 0.7660 ± 0.125        | 0.8706 ± 0.197        |
| <i>FL</i>     | <b>0.8706 ± 0.129</b>      | <b>0.7821 ± 0.151</b> | <b>0.8315 ± 0.132</b> | <b>0.9513 ± 0.096</b> |
| <i>TL</i>     | 0.7103 ± 0.176             | 0.7201 ± 0.130        | 0.7542 ± 0.203        | 0.8360 ± 0.071        |
| <i>FTL</i>    | 0.8238 ± 0.192             | 0.7725 ± 0.144        | 0.8285 ± 0.194        | 0.8973 ± 0.214        |

Table 4: Effect of varying Dilation rate *D* on *AMC-Net*, measured in terms of *DSC* over the test datasets

| <i>D</i> in <i>MS</i> -block | Kaggle-COVID-19:<br>Part-2 | CT-Seg                | Seg-nr.2              | MosMed                |
|------------------------------|----------------------------|-----------------------|-----------------------|-----------------------|
| 1,2,3,4                      | 0.8017 ± 0.182             | 0.7018 ± 0.176        | 0.7552 ± 0.150        | 0.8910 ± 0.101        |
| 1,2,4,8                      | 0.7482 ± 0.149             | 0.6617 ± 0.168        | 0.7001 ± 0.152        | 0.8527 ± 0.107        |
| 1,2,3,5                      | <b>0.8706 ± 0.129</b>      | <b>0.7821 ± 0.151</b> | <b>0.8315 ± 0.132</b> | <b>0.9513 ± 0.096</b> |

Table 5: Prediction of affected region, by *EAMC*, considering two samples slices from each test dataset

| Dataset                    | Sample no.<br>in Fig. 8 | Ground<br>truth (%) | Prediction<br>(%) by <i>EAMC</i> |
|----------------------------|-------------------------|---------------------|----------------------------------|
| Kaggle-COVID-19:<br>Part-2 | S1                      | 57.63               | 57.71                            |
|                            | S2                      | 85.28               | 84.71                            |
| CT-Seg                     | S3                      | 89.11               | 88.12                            |
|                            | S4                      | 78.82               | 79.34                            |
| Seg-nr.2                   | S5                      | 60.91               | 61.15                            |
|                            | S6                      | 62.71               | 62.18                            |
| MosMed                     | S7                      | 11.62               | 10.98                            |
|                            | S8                      | 13.74               | 14.02                            |

304 regions, to illustrate the grading of severity. Here red corresponds to the most severe,  
305 yellow indicates moderate, and blue refers to the least severe infections. Such analysis  
306 can be of assistance in predicting the grading of infection in a sample patient, along  
307 with an estimation of the expected prognosis.

### 308 Discussion

309 Medical imaging provides useful assistance for the safe, efficient, and early detection,  
310 diagnosis, isolation, and prognosis of diseases. It enables non-invasive examination of  
311 the interior organs, bones and tissues, allowing for accurate assessment of disease sever-  
312 ity. Particularly, with the advancement in CT imaging technology, very high resolution  
313 images serve as suitable diagnostic tool in the medical domain. The recent COVID-19

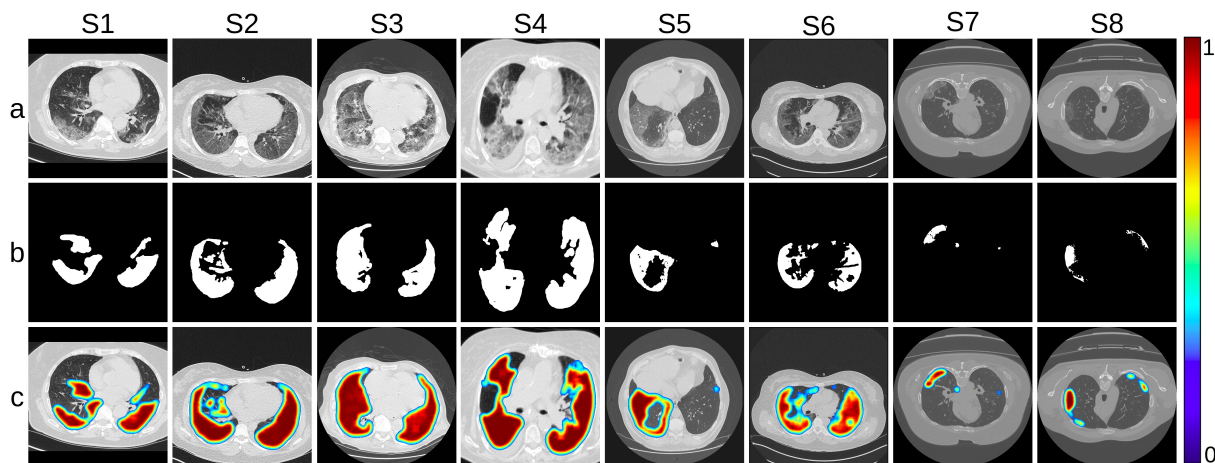

Figure 7: Visualization of infection, in the eight sample slices from Fig. 8, as predicted by *EAMC*. (a) Input CT scan, (b) corresponding annotation, and (c) JET ColorMap on the prediction

314 pandemic demonstrated that CT images are often more accurate as compared to the  
 315 standard RT-PCR tests, which can exhibit False Positives. The CT images can provide  
 316 a lot more information, like the severity of infection and the presence and distribution  
 317 of pathologies like GGO and Consolidation. Therefore, CT images are gradually be-  
 318 coming a primary tool for the detection and prognosis in COVID-19. As the increased  
 319 number of cases for diagnosis made the job over-burdening, the need for automated  
 320 and more accurate segmentation, detection and analysis became evident.

321 Our research using deep convolutional networks in medical imaging analysis, demon-  
 322 strated efficient extraction of valuable features. The results depict how observable  
 323 features from the COVID-19 ROI, encompassing GGOs and consolidations, could be  
 324 effectively retrieved from various blocks at different levels. The severity of the disease  
 325 could also be assessed. The qualitative and quantitative statistics illustrate the su-  
 326 periority of our model with respect to related methods in literature. The qualitative  
 327 output demonstrates that the proposed *EMAC* generates very few misclassified pixels  
 328 corresponding to the ROI. The data revealed the presence of a substantial propor-  
 329 tion of pixels from the background region, with a relatively smaller number from the  
 330 ROI. Such a significant class imbalance is effectively addressed by the loss function  
 331 discussed. Our patch-based method performs exceptionally well, in terms of accuracy  
 332 and loss over training and validation, for an effective management of overfitting in  
 333 deep learning. Use of CT images, obtained from several other sources, established the  
 334 robustness of our methodology in handling imaging differences at the source.

335 A novel ensembling method by *LOPO* was developed for a collective, efficient delin-  
 336 eation of COVID-19 affected region in the lung, along with a gradation of the severity  
 337 of the disease, using very limited training data. Multi-scalar attention with deep su-  
 338 pervision enabled enhanced accuracy, in terms of improved sensitivity and precision in  
 339 segmentation of ROI, for the proposed model *EAMC*. The loss function helped focus  
 340 on the imbalanced representation of the ROIs, in terms of GGOs and consolidations in  
 341 the CT slices. While the training was performed on one set of annotated data, the test-  
 342 ing set comprised of an assortment of data from different sources of publicly available  
 343 sets. The superiority of the network was thus established in a broader generalization  
 344 framework.

345 Sample qualitative results in Fig. 8, corresponding to the models compared in Fig. 5,  
 346 help establish the robustness and effectiveness of *EAMC* under ensembling by *LOPO*  
 347 on the backbone *AMC*-Nets. The output is evaluated in terms of the annotated masks.  
 348 The eight samples explored were (i) *S1*, *S2* from Kaggle-COVID-19: Part-2; (ii) *S3*,



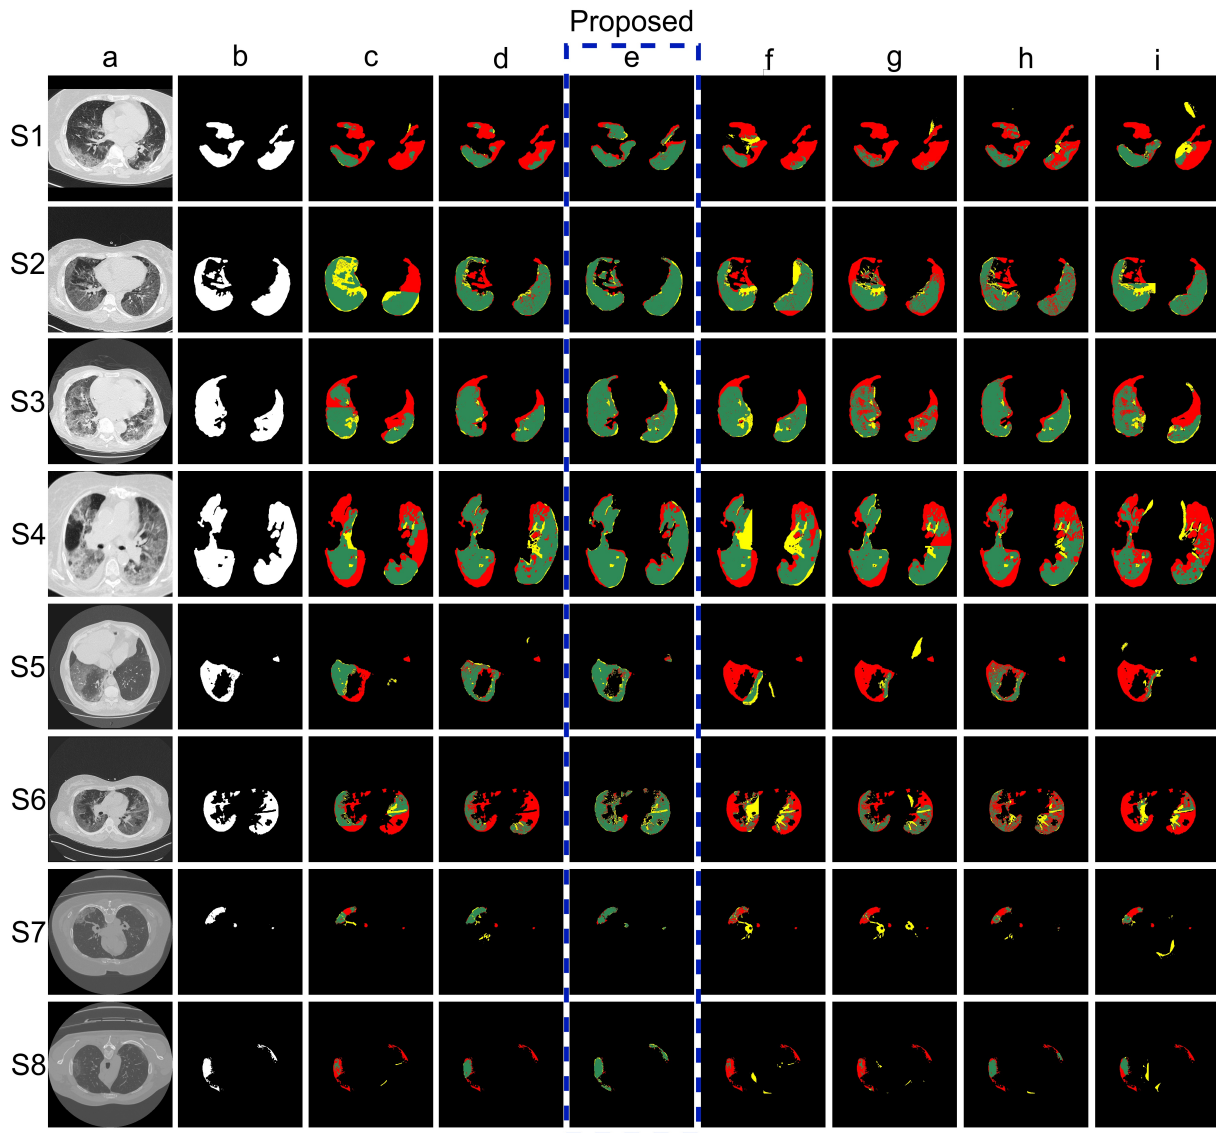

Figure 8: Sample segmentation output by base classifiers, in the uniform framework of ensembling with *LOPO*. (a) Original CT scan, with (b) Annotated masks. Segmentation obtained by (c) *U-Net*, (d) Attention *U-Net*, (e) *AMC-Net*, (f) *R2UNet*, (g) Inception Net, (h) Xception Net, and (i) DenseNet, where regions **Green**: True Positive, **Red**: False Negative, **Yellow**: False Positive

349 *S4* from CT-Seg; (iii) *S5*, *S6* from Seg-nr.2; and (iv) *S7*, *S8* from MosMed. It is  
 350 observed that the *AMC-Net*, of column (e) in the figure, performed the best. Results  
 351 were corroborated with the confusion matrix of Fig. 9, providing an indication of the  
 352 distribution of misclassified pixels for a sample segmentation mask *S4*. The confusion  
 353 was seen to be the least in case of the *AMC-Net* [column (c)]. It resulted in the  
 354 minimum over- and under-segmentation for all eight samples considered here.

355 Note that over-segmentation corresponds to higher count of *FP* pixels (yellow) and  
 356 under-segmentation refers to higher *FN* (red). Considering sample *S4* as an example,  
 357 it is clearly evident that state-of-the-art models *U-Net*, Attention *U-Net*, Inception  
 358 Net, Xception Net, DenseNet demonstrate under-segmentation, while model *R2UNet*  
 359 is indicative of over-segmentation. On the other hand, our *AMC-Net* [column (e), Fig.  
 360 5] exhibited significantly lower under- and/or over-segmentation for the same sample  
 361 *S4*. The corresponding confusion matrix in Fig. 9 corroborates these findings.

362 The model complexity, in terms of the number of parameters, is enumerated in

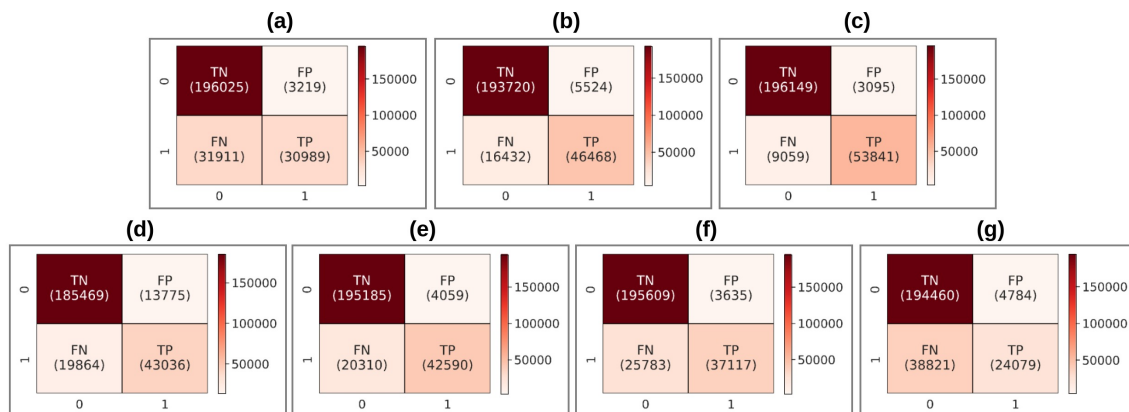

Figure 9: Confusion matrix for a sample  $S_4$  from Fig. 8 segmentation mask, by the base classifiers, in the uniform framework of ensembling with *LOPO*. Models (a) *U-Net*, (b) Attention *U-Net*, (c) *AMC-Net*, (d) *R2UNet*, (e) Inception Net, (f) Xception Net, and (g) DenseNet

Table 6: Comparative computational analysis of base model parameters, along with *DSC* obtained

| Model         | <i>U-Net</i> | Attention <i>U-Net</i> | <i>MSU-Net</i> | <i>AMC-Net</i> | <i>R2UNet</i> | Inception Net | Xception Net | DenseNet |        |
|---------------|--------------|------------------------|----------------|----------------|---------------|---------------|--------------|----------|--------|
| #parameters   | 1.96M        | 1.99M                  | 3.31M          | 3.34M          | 6.00M         | 11.99M        | 2.05M        | 4.26M    |        |
| <i>DSC on</i> | Kaggle       | 0.6082                 | 0.7492         | 0.7477         | <b>0.8840</b> | 0.6772        | 0.5924       | 0.7972   | 0.6729 |
|               | CT-Seg       | 0.5124                 | 0.7054         | 0.6924         | <b>0.7955</b> | 0.5762        | 0.6327       | 0.7172   | 0.6766 |
|               | Seg-nr.2     | 0.5921                 | 0.7180         | 0.7173         | <b>0.8431</b> | 0.6304        | 0.6275       | 0.8331   | 0.8105 |
|               | MosMed       | 0.6896                 | 0.8300         | 0.8224         | <b>0.9584</b> | 0.7029        | 0.7145       | 0.8908   | 0.8220 |

363 Table 6. Although the proposed *EAMC* involves slightly more parameters than *U-Net*,  
 364 Attention *U-Net*, *MSU-Net*, Xception Net, it is less than that of *R2UNet*, DenseNet,  
 365 and much lower as compared to Inception Net. Note that the overall comparative  
 366 performance of *EAMC* is better than the state-of-the-art methods, as evident in Fig.  
 367 5. A representative study for *DSC* on all the four test datasets is also provided in the  
 368 table.

369 The technique holds promise in other medical image domains, including (but not  
 370 limited to) detection of lesions in MRI images of the brain or pathologies in fundus  
 371 images of the eye for screening diabetic retinopathy.

## 372 4 Methodology

373 The architecture of our *EAMC* is novel. It consists of an ensemble of Attention-  
 374 modulated Multi-Scalar (*MS*) blocks along the encoding and decoding paths of a  
 375 U-Net. Incorporation of dilated convolutions in the *MS*-block, in lieu of down- and/or  
 376 up-sampling, improves the overall performance and makes it robust to generalization.  
 377 Focal loss function [18] is employed for effectively handling class imbalance in the  
 378 data. The Leave-One-Patient-Out (*LOPO*) ensembling effectively trains a network  
 379 from scratch (each time leaving one patient sample out). This scheme creates the  
 380 necessary diversity in data, while training a completely new model with different pa-  
 381 rameters and scarce annotated samples.

382 The Attention-modulated *MS*-blocks form the *AMC-Net* modules, serving as the  
 383 base classifier for our ensembled *EAMC*. This is illustrated in Fig. 2, with elaborated

384 description of the individual modules being provided in Tables 7-9. The *MS*-block ex-  
 385 tracts multi-scalar features using a concatenation of four dilated convolutional layers,  
 386 having dilation rates  $D = 1, 2, 3, 5$ . A dilated convolution (Fig. 10) inserts holes into  
 387 the standard convolution map, thereby expanding its receptive fields. Thus dilated  
 388 convolutions can enlarge a receptive field, without any loss of information, while re-  
 389 taining the kernel size. Finally  $1 \times 1$  convolutions are employed on the concatenated  
 390 multi-scalar feature map. The *MS*-block is depicted in Fig. 2(b) and Table 8.

Table 7: *AMC-Net* module of Fig. 2(a)

| Block: i                | Input: (128 * 128 * 1) CT image                                                                                                                                                                                                                                        |
|-------------------------|------------------------------------------------------------------------------------------------------------------------------------------------------------------------------------------------------------------------------------------------------------------------|
| 1                       | conv <sub>1</sub> (3*3), 16<br>MS-Block(conv <sub>1</sub> ), 16 (Described in Table 8)<br>conv <sub>2</sub> (3*3), 16<br>maxpooling <sub>1</sub> (2*2)                                                                                                                 |
|                         | conv <sub>3</sub> (3*3), 32<br>MS-Block(conv <sub>3</sub> ), 32<br>conv <sub>4</sub> (3*3), 32<br>maxpooling <sub>2</sub> (2*2)                                                                                                                                        |
|                         | conv <sub>5</sub> (3*3), 64<br>MS-Block(conv <sub>5</sub> ), 64<br>conv <sub>6</sub> (3*3), 64<br>maxpooling <sub>3</sub> (2*2)                                                                                                                                        |
| 4                       | conv <sub>7</sub> (3*3), 128<br>MS-Block(conv <sub>7</sub> ), 128<br>conv <sub>8</sub> (3*3), 128<br>maxpooling <sub>4</sub> (2*2)                                                                                                                                     |
|                         | conv <sub>9</sub> (3*3), 256<br>conv <sub>10</sub> (3*3), 256<br>Upsampling <sub>1</sub> (2*2)<br>AG(conv <sub>8</sub> , Upsampling <sub>1</sub> ), 64 (Described in Table 9)                                                                                          |
| 6                       | concat <sub>1</sub> (Upsampling <sub>1</sub> , Multiply <sub>1</sub> )<br>conv <sub>11</sub> (3*3), 128<br>MS-Block(conv <sub>11</sub> ), 128<br>conv <sub>12</sub> (3*3), 128<br>Upsampling <sub>2</sub> (2*2)<br>AG (conv <sub>6</sub> Upsampling <sub>2</sub> ), 32 |
|                         | concat <sub>2</sub> (Upsampling <sub>2</sub> , Multiply <sub>2</sub> )<br>conv <sub>13</sub> (3*3), 64<br>MS-Block(conv <sub>13</sub> ), 64<br>conv <sub>14</sub> (3*3), 64<br>Upsampling <sub>3</sub> (2*2)<br>AG (conv <sub>4</sub> , Upsampling <sub>3</sub> ), 16  |
|                         | concat <sub>3</sub> (Upsampling <sub>3</sub> , Multiply <sub>3</sub> )<br>conv <sub>15</sub> (3*3), 32<br>MS-Block(conv <sub>15</sub> ), 32<br>conv <sub>16</sub> (3*3), 32<br>Upsampling <sub>4</sub> (2*2)<br>AG (conv <sub>2</sub> , Upsampling <sub>4</sub> ), 8   |
|                         | concat <sub>4</sub> (Upsampling <sub>4</sub> , Multiply <sub>4</sub> )<br>conv <sub>17</sub> (3*3), 16<br>MS-Block(conv <sub>17</sub> ), 16<br>conv <sub>18</sub> (3*3), 16<br>conv <sub>19</sub> (1*1), 1<br>Sigmoid activation                                       |
| Output: (128 * 128 * 1) |                                                                                                                                                                                                                                                                        |

Table 8: *MS*-block module of Fig. 2(b)

| MS-Block(conv <sub>M</sub> ), n (n = No. of features)                                           |
|-------------------------------------------------------------------------------------------------|
| Input(conv <sub>M</sub> ) -> conv <sub>D-1</sub> (3*3), n                                       |
| Input(conv <sub>M</sub> ) -> conv <sub>D-2</sub> (3*3), n                                       |
| Input(conv <sub>M</sub> ) -> conv <sub>D-3</sub> (3*3), n                                       |
| Input(conv <sub>M</sub> ) -> conv <sub>D-5</sub> (3*3), n                                       |
| concat (conv <sub>D-1</sub> , conv <sub>D-2</sub> , conv <sub>D-3</sub> , conv <sub>D-5</sub> ) |

Table 9: Attention Gates (*AG*) of Fig. 2(c)

| AG (conv <sub>X</sub> , Upsampling <sub>Y</sub> ), n (n = No. of features) |
|----------------------------------------------------------------------------|
| Input(Upsampling <sub>Y</sub> ) -> conv <sub>a</sub> (1*1), n              |
| Input(conv <sub>X</sub> ) -> conv <sub>b</sub> (1*1), n                    |
| conv <sub>a</sub> + conv <sub>b</sub>                                      |
| ReLU activation                                                            |
| conv <sub>c</sub> (1*1), 1                                                 |
| Sigmoid Activation -> SA                                                   |
| conv <sub>X</sub> * SA -> Multiply <sub>Y</sub>                            |

391 The *AMC-Net* contains nine convolutional blocks, four max-pooling layers, four  
 392 Upsampling convolutional layers and eight *MS*-blocks. First the CT image patches of  
 393 size  $128 \times 128$  are fed at the input. The patches percolate down four sets of iterations  
 394 of  $2 \times 2$  max-pooling layers,  $3 \times 3$  convolutional and *MS*-block layers, involving a stride

395 of 1 in the encoder. The  $2 \times 2$  Upsampling layers in the decoder help recover the final  
396 resolution of an image.

397 The *MS*-blocks are added after the ordinary convolutions in the first four encoder  
398 and the last four decoder layers. They help obtain multi-scalar contextual information,  
399 to reduce the error along the segmentation boundary for improved accuracy. The  
400 COVID-19 infection lesions are typically hard to segment; mainly due to their uneven  
401 distribution and varying dimensions. The high-level semantic feature maps in the  
402 decoder, concatenated through the attention mechanism, focus on the low-level details  
403 in the extracted feature maps (of the encoder) to accurately recover the details of the  
404 infected regions in the CT slices.

405 The Attention gates (*AG*) of Fig. 2(c) provide the necessary importance to each  
406 pixel during decoding. The upsampled images, along with their encoded versions at  
407 the same level, are combined to enhance the importance of a pixel through spatial  
408 attention. Adaptive selection of spatial information is achieved by emphasizing pixels  
409 from the regions of interest, while suppressing the less relevant ones. Four attention  
410 modules are introduced for adaptive feature refinement. A sequential spatial attention  
411 module is embedded into each decoding block to avoid overfitting, while accelerating  
412 the training of the *EAMC*.

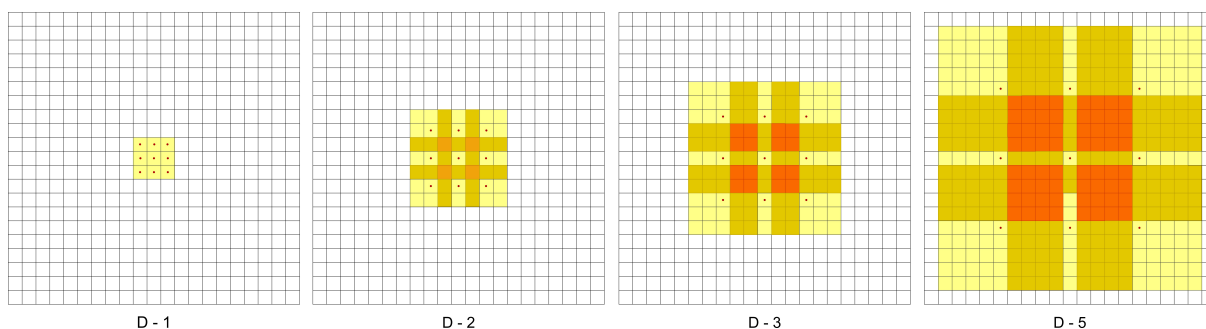

Figure 10:  $D$ -dilated convolutions, with  $D = 1, 2, 3, 5$

The activation function at the final layer of the *AMC-Net* is the sigmoid. It generates a probabilistic output for the ROI. The choice of a loss function has direct impact on model performance. Loss functions represent the computation of error over each batch, during backpropagation training, and reflect the adjustment of network weights. It was found, after several experiments, that focal loss was the best choice. Let the ground truth segmentation mask be  $\mathbf{y} \in \{\pm 1\}$ , with the corresponding predicted mask being  $\hat{\mathbf{y}}$  with estimated probability  $p \in [0, 1]$ . Focal Loss (*FL*) [18] overcomes class imbalance in datasets, where positive patches are relatively scarce. The cross entropy (*CE*) loss for binary classification is defined as

$$CE(p, y) = \begin{cases} -\log p, & \text{if } y = 1, \\ -\log(1 - p), & \text{otherwise.} \end{cases} \quad (1)$$

For convenience, let

$$p_t = \begin{cases} p, & \text{if } y = 1, \\ 1 - p, & \text{otherwise,} \end{cases} \quad (2)$$

such that  $CE(p, y) = CE(p_t) = -\log(p_t)$ . The  $\alpha$ -balanced focal loss is defined as

$$FL(p_t) = -\alpha(1 - p_t)^\gamma \log(p_t), \quad (3)$$

413 with the choice of weighting factor  $\alpha = 0.8$  and focusing parameter  $\gamma = 2$  being made  
414 after several experiments.

Some of the other loss functions, explored in the ablation studies, include the Dice Loss ( $DL$ ) [38]

$$DL(y, \hat{y}) = \left(1 - \frac{2y\hat{y} + 1}{y + \hat{y} + 1}\right), \quad (4)$$

where 1 is added in the numerator and denominator to ensure that in edge case scenarios, such as when  $\mathbf{y} = \hat{\mathbf{y}} = 0$ , the function does not become undefined. The  $CEDL$  loss [18] is defined as a combination of  $DL$  and the cross-entropy ( $CE$ ) loss for binary classification, thereby incorporating the benefits from both. We have

$$CEDL(y, \hat{y}) = -\{y \log(\hat{y}) + (1 - y) \log(1 - \hat{y})\} + DL(y, \hat{y}). \quad (5)$$

The  $IoU$  metric [40], or Jaccard Index, is computed as the ratio between the overlap of the positive instances between two sets, and their mutual combined values. It is expressed as

$$IoU(y, \hat{y}) = \left(1 - \frac{y\hat{y} + 1}{y + \hat{y} + y\hat{y} + 1}\right). \quad (6)$$

The Tversky loss ( $TL$ ) [1] optimises the segmentation on imbalanced medical datasets. It adjusts the constants  $\alpha$  and  $\beta$  to give special weightage to errors like  $FP$  and  $FN$ . We have

$$TL(y, \hat{y}) = \left(1 - \frac{y\hat{y} + 1}{y\hat{y} + \beta(1 - y)\hat{y} + \alpha y(1 - \hat{y}) + 1}\right). \quad (7)$$

The Focal Tversky loss ( $FTL$ ) [1] also focuses on the difficult samples, by down-weighting easier (or common) ones. It attempts to learn the harder examples, like small ROIs, with the help of the  $\gamma$  coefficient. It is defined as

$$FTL(y, \hat{y}) = (1 - TL)^{1/\gamma}. \quad (8)$$

415 A value of  $\gamma = 2$  was employed, after several experiments.

Diversity is introduced in this ensembling of the  $AMC$ -Nets, by varying the training datasets through  $LOPO$ ; thereby, changing the initialization of the networks, and modulating the choice of parameters of the  $EAMC$  system. The performance of the models is evaluated in terms of the following metrics. We define the number of pixels, (i) correctly classified as positive by True Positive ( $TP$ ), (ii) incorrectly classified as positive, by False Positive ( $FP$ ), (iii) correctly identified as negative as True Negative ( $TN$ ), and falsely classified as negative by False Negative ( $FN$ ).

The metrics used are *Dice Score Coefficient*

$$\mathbf{DSC} = \left(\frac{2 * TP}{2 * TP + FP + FN}\right), \quad (9)$$

$$\mathbf{Precision} = \left(\frac{TP}{TP + FP}\right), \quad (10)$$

$$\mathbf{Sensitivity} = \left(\frac{TP}{TP + FN}\right), \quad (11)$$

416 and Area Under the *Receiver Operating Characteristic Curve* ( $AUC$ ). The  $ROC$  curve  
417 typically plots the  $TP$  rate vs the  $FP$  rate, over different thresholds. Higher values of  
418 these indices imply a better quality of segmentation [30, 34].

## 419 5 Data Preparation

420 Pixel values in range  $[0, 255]$  were normalized, keeping the HU range in interval  $[-$   
421  $1024, 3071]$ , to enable the model visualize and learn all the areas (like, infection, bone,



422 tissues) inside the CT scan images. Instead of initially extracting the lung part from  
423 the full CT slice [36], we directly detect the infected area from the entire image for  
424 subsequent segmentation of the COVID-infected ROI. Class imbalance between the  
425 infected and non-infected areas of the CT slices was considered, in terms of positive  
426 (infected) and negative (non-infected) patches over the data.

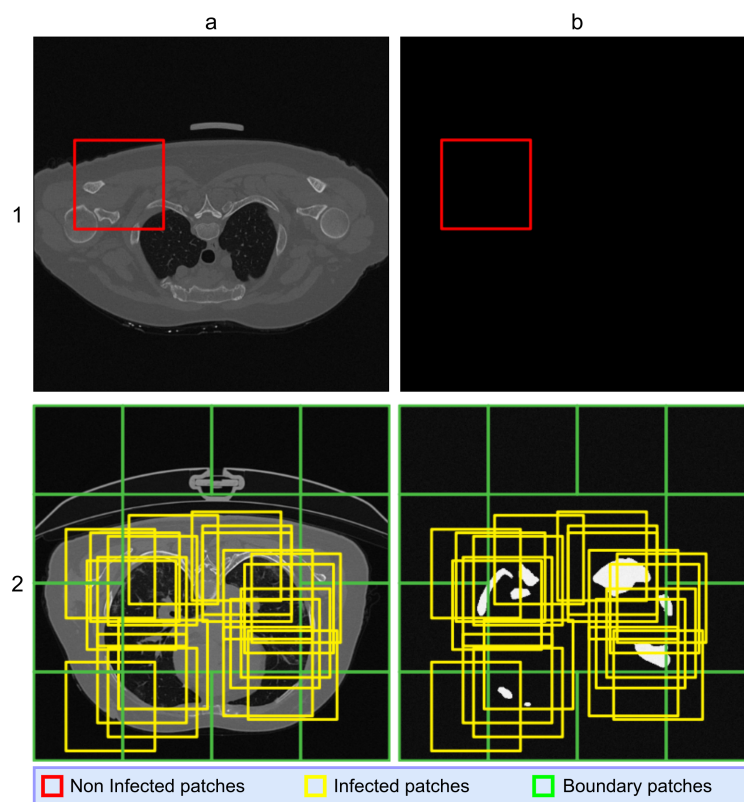

Figure 11: *Row 1:* Patch extraction from training CT slices, depicting no infected regions. 1(a) Non-infected patches, and 1(b) corresponding annotated masks.

*Row 2:* Patch extraction from training CT slices, depicting infected regions. 2(a) Overlapping patches, and 2(b) mapping to corresponding annotated masks.

## 427 5.1 Training

428 Availability of annotated training data, depicting infection masks, is scarce and leads  
429 to class imbalance. In order to circumvent this problem, we extracted overlapping  
430 patches to increase the training data while uniformly representing relevant ROI.

431 The ground truth corresponding to each axial slice, of each CT volume of the  
432 training data was checked. If there existed no infected region on a slice then it was  
433 labeled as “non-infected” (Fig. 11, *Row: 1*). Random  $128 \times 128$  patches were extracted.

434 When there existed a region of infection in any axial slice, it was labeled as  
435 “infected” (Fig. 11, *Row: 2*). Twenty random  $128 \times 128$  bounding boxes were drawn  
436 over the ROI to extract the patches. Next all twelve  $128 \times 128$  boundary patches (inside  
437 the  $512 \times 512$  axial slice) were considered.

438 The distribution of infected and non-infected slices and/or patches, after patch  
439 extraction to create the training set, is displayed in Table 10. Representative extracted  
440 patches, along with the corresponding annotated masks, are presented in Fig. 12.1 for  
441 the infected slices and Fig. 12.2 for the non-infected ones.

Table 10: Distribution of infected and non-infected Slices & Patches extracted for training

| Patient No. | Sample Name         | Slices   |              | Patches  |              |
|-------------|---------------------|----------|--------------|----------|--------------|
|             |                     | Infected | Non-infected | Infected | Non-infected |
| P1          | coronacases_org_001 | 161      | 140          | 3534     | 1758         |
| P2          | coronacases_org_002 | 143      | 57           | 3114     | 1519         |
| P3          | coronacases_org_003 | 137      | 63           | 3198     | 1249         |
| P4          | coronacases_org_004 | 113      | 157          | 2341     | 1432         |
| P5          | coronacases_org_005 | 116      | 174          | 2342     | 1544         |
| P6          | coronacases_org_006 | 70       | 143          | 1503     | 880          |
| P7          | coronacases_org_007 | 93       | 156          | 2067     | 1065         |
| P8          | coronacases_org_008 | 216      | 85           | 4647     | 2350         |
| P9          | coronacases_org_009 | 111      | 145          | 2276     | 1421         |
| P10         | coronacases_org_010 | 191      | 110          | 4375     | 1847         |

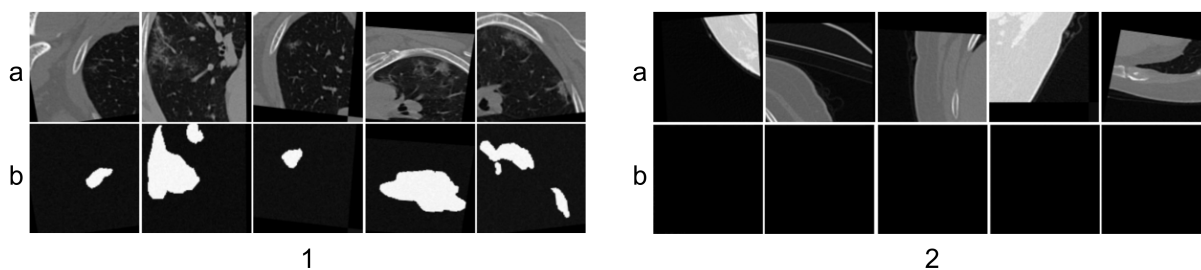

Figure 12: The (a) extracted patches, and (b) corresponding annotation (post-run-time augmentation), for sample slices which are 1: infected, and 2: non-infected

## 5.2 Testing

As only the ROI and background need to be separated for the test images, here the extraction of non-overlapping patches serve the purpose. Axial slices ( $512 \times 512$ ) were extracted from each test CT volume. Sixteen  $128 \times 128$  non-overlapping patches were obtained from each slice, as depicted in Fig. 13.

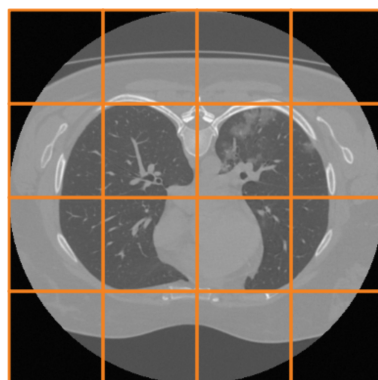

Figure 13: Patch extraction from test CT slices.

## References

447

448 [1] N. Abraham and N. M. Khan. A Novel Focal Tversky Loss Function With Im-  
449 proved Attention U-Net for Lesion Segmentation. In *Proceedings of the IEEE 16th*  
450 *International Symposium on Biomedical Imaging (ISBI 2019)*, volume ISBI 2019,  
451 pages 683–687, 2019.

452 [2] M. Z. Alom, M. Hasan, et al. Recurrent Residual Convolutional Neural Net-  
453 work based on U-Net (R2U-Net) for Medical Image Segmentation. *CoRR*,  
454 abs/1802.06955, 2018.

455 [3] X. Bai, H. Wang, et al. Advancing COVID-19 diagnosis with privacy-preserving  
456 collaboration in artificial intelligence. *Nature Machine Intelligence*, 3(12):1081–  
457 1089, 2021.

458 [4] S. Banerjee, S. Mitra, and B. Uma Shankar. Automated 3D segmentation of brain  
459 tumor using visual saliency. *Information Sciences*, 424:337–353, 2018.

460 [5] M. Barstugan, U. Ozkaya, et al. Coronavirus (COVID-19) Classification using CT  
461 Images by Machine Learning Methods. *CoRR*, abs/2003.09424, 2020.

462 [6] S. Basu, S. Mitra, and N. Saha. Deep Learning for Screening COVID-19 using  
463 Chest X-Ray Images. In *Proceedings of the IEEE Symposium Series on Compu-*  
464 *tational Intelligence (SSCI)*, pages 2521–2527. IEEE, 2020.

465 [7] T. Ben-Haim, R. M. Sofer, et al. A Deep Ensemble Learning Approach to Lung  
466 CT Segmentation for Covid-19 Severity Assessment. In *Proceedings of the IEEE*  
467 *International Conference on Image Processing (ICIP)*, pages 151–155. IEEE, 2022.

468 [8] R. Cong, Y. Zhang, et al. Boundary Guided Semantic Learning for Real-time  
469 COVID-19 Lung Infection Segmentation System. *IEEE Transactions on Con-*  
470 *sumer Electronics*, 68(4):376–386, 2022.

471 [9] T. G. Dietterich. Ensemble methods in machine learning. In *International Work-*  
472 *shop on Multiple Classifier Systems*, pages 1–15. Springer, 2000.

473 [10] X. Ding, J. Xu, et al. Chest CT findings of COVID-19 pneumonia by duration of  
474 symptoms. *European Journal of Radiology*, 127:109009, 2020.

475 [11] N. Enshaei, P. Afshar, et al. An Ensemble Learning Framework For Multi-Class  
476 Covid-19 Lesion Segmentation From Chest CT Images. In *Proceedings of the*  
477 *IEEE International Conference on Autonomous Systems (ICAS)*, volume ICAS  
478 2021, pages 1–6, 2021.

479 [12] Y. Fang, H. Zhang, et al. Sensitivity of chest CT for COVID-19: comparison to  
480 RT-PCR. *Radiology*, 296(2):E115–E117, 2020.

481 [13] L. Geng, S. Zhang, et al. Lung segmentation method with dilated convolution  
482 based on VGG-16 network. *Computer Assisted Surgery*, 24(sup2):27–33, 2019.

483 [14] I. Goodfellow, Y. Bengio, and A. Courville. *Deep Learning*. MIT Press, 2016.

484 [15] D. P. Kingma and J. Ba. Adam: A method for stochastic optimization. *arXiv*  
485 *preprint arXiv:1412.6980*, 2014.

486 [16] A. Krizhevsky, I. Sutskever, et al. Imagenet classification with deep convolutional  
487 neural networks. *Communications of the ACM*, 60(6):84–90, 2017.

- 488 [17] Y. Li and L. Xia. Coronavirus disease 2019 (COVID-19): Role of chest CT in  
489 diagnosis and management. *American Journal of Roentgenology*, 214(6):1280–  
490 1286, 2020.
- 491 [18] T.-Y. Lin, P. Goyal, et al. Focal Loss for Dense Object Detection. *IEEE Trans-*  
492 *actions on Pattern Analysis and Machine Intelligence*, 42(2):318–327, 2017.
- 493 [19] J. Ma, Y. Wang, et al. Toward data-efficient learning: A benchmark for COVID-19  
494 CT lung and infection segmentation. *Medical Physics*, 48(3):1197–1210, 2021.
- 495 [20] S. P. Morozov, Andreychenko, et al. MosMedData: data set of 1110 chest CT  
496 scans performed during the COVID-19 epidemic. *Digital Diagnostics*, 1(1):49–59,  
497 2020.
- 498 [21] S. P. Morozov, A. E. Andreychenko, et al. MosMedData: Chest CT Scans With  
499 COVID-19 Related Findings Dataset. *CoRR*, abs/2005.06465, 2020.
- 500 [22] Y. Oh, S. Park, et al. Deep Learning COVID-19 Features on CXR Using Limited  
501 Training Data Sets. *IEEE Transactions on Medical Imaging*, 39(8):2688–2700,  
502 2020.
- 503 [23] O. Oktay, J. Schlemper, et al. Attention U-Net: Learning Where to Look for the  
504 Pancreas. *CoRR*, abs/1804.03999, 2018.
- 505 [24] C. Parmar, E. Rios Velazquez, et al. Robust radiomics feature quantification using  
506 semiautomatic volumetric segmentation. *PloS One*, 9(7):e102107, 2014.
- 507 [25] R. Polikar. Ensemble based systems in decision making. *IEEE Circuits and*  
508 *Systems Magazine*, 6(3):21–45, 2006.
- 509 [26] M. Roberts, D. Driggs, et al. Common pitfalls and recommendations for using ma-  
510 chine learning to detect and prognosticate for COVID-19 using chest radiographs  
511 and CT scans. *Nature Machine Intelligence*, 3(3):199–217, 2021.
- 512 [27] O. Ronneberger, P. Fischer, et al. U-Net: Convolutional networks for biomedical  
513 image segmentation. In N. Navab, J. Hornegger, et al., editors, *Proceedings of the*  
514 *Medical Image Computing and Computer-Assisted Intervention – MICCAI 2015:*  
515 *18th International Conference*, volume 9351 of *LNCS*, pages 234–241. Springer,  
516 2015.
- 517 [28] S. Shabani, M. Homayounfar, et al. Self-supervised region-aware segmentation  
518 of COVID-19 CT images using 3D GAN and contrastive learning. *Computers in*  
519 *Biology and Medicine*, 149:106033, 2022.
- 520 [29] H. K. Siddiqi, P. Libby, et al. COVID-19—A vascular disease. *Trends in Cardio-*  
521 *vascular Medicine*, 31(1):1–5, 2021.
- 522 [30] Y. Song, J. Liu, et al. COVID-19 Infection Segmentation and Severity Assessment  
523 Using a Self-Supervised Learning Approach. *Diagnostics*, 12(8):1805, 2022.
- 524 [31] W. Sun, X. Feng, et al. Weakly supervised segmentation of COVID-19 infec-  
525 tion with local lesion coherence on CT images. *Biomedical Signal Processing and*  
526 *Control*, 79, Part-1:104099, 2022.
- 527 [32] G. Wang, W. Li, et al. Interactive Medical Image Segmentation Using Deep Learn-  
528 ing With Image-Specific Fine Tuning. *IEEE Transactions on Medical Imaging*,  
529 37(7):1562–1573, 2018.

- 530 [33] P. Wang, Z. Li, Y. Hou, and W. Li. Action recognition based on joint trajec-  
531 tory maps using convolutional neural networks. In *Proceedings of the 24th ACM*  
532 *International Conference on Multimedia*, pages 102–106, 2016.
- 533 [34] Q. Wang, X. Li, et al. A regularization-driven mean teacher model based on  
534 semi-supervised learning for medical image segmentation. *Physics in Medicine &*  
535 *Biology*, 67(17):175010, 2022.
- 536 [35] S. Wang, Y. Zha, et al. A fully automatic deep learning system for COVID-19  
537 diagnostic and prognostic analysis. *European Respiratory Journal*, 56(2):2000775:  
538 Pages–9, 2020.
- 539 [36] D. Wu, K. Gong, et al. Severity and consolidation quantification of COVID-19  
540 from CT images using deep learning based on hybrid weak labels. *IEEE Journal*  
541 *of Biomedical and Health Informatics*, 24(12):3529–3538, 2020.
- 542 [37] K. Zhang, X. Liu, et al. Clinically applicable AI system for accurate diagnosis,  
543 quantitative measurements, and prognosis of COVID-19 pneumonia using com-  
544 puted tomography. *Cell*, 181(6):1423–1433.e11, 2020.
- 545 [38] Y. Zhang, S. Liu, et al. Rethinking the Dice Loss for Deep Learning Lesion Seg-  
546 mentation in Medical Images. *Journal of Shanghai Jiaotong University (Science)*,  
547 26(1):93–102, 2021.
- 548 [39] Z. Zhang, Q. Liu, et al. Road Extraction by Deep Residual U-Net. *IEEE Geo-*  
549 *science and Remote Sensing Letters*, 15(5):749–753, 2018.
- 550 [40] D. Zhou, J. Fang, et al. IoU Loss for 2D/3D Object Detection. In *Proceedings*  
551 *of the International Conference on 3D Vision (3DV)*, volume 3DV, pages 85–94,  
552 2019.
- 553 [41] L. Zhou, X. Meng, et al. An interpretable deep learning workflow for discovering  
554 subvisual abnormalities in CT scans of COVID-19 inpatients and survivors. *Nature*  
555 *Machine Intelligence*, 4(5):494–503, 2022.
